# Supplementary material for: Tung Oil Thermal Treatment Improves the Visual Effects of Moso Bamboo Materials
Source: MDPI journal article supplement (doi:10.3390/polym14061250), 2022-03-20
Supplement: s1 [file s1]

## Supplementary material

### Tung oil thermal treatment improves the visual effects of moso bamboo materials

Tong Tang <sup>1,2,\*</sup>, Benhua Fei <sup>2</sup>, Wei Song <sup>2</sup>, Na Su <sup>2</sup>, Fengbo Sun <sup>2,\*</sup>

<sup>1</sup> School of Art & Design, Qilu University of Technology (Shandong Academy of Sciences), Jinan 250353, China

<sup>2</sup> Key Laboratory of Bamboo and Rattan Science and Technology of the State Forestry Administration, Department of Biomaterials, International Center for Bamboo and Rattan, Beijing 100102, China; [feibenhua@icbr.ac.cn](mailto:feibenhua@icbr.ac.cn) (B.F.); [j5international@163.com](mailto:j5international@163.com) (W.S.); [yuhesu122216@126.com](mailto:yuhesu122216@126.com) (N.S.)

\* Correspondence: [tangtong@qlu.edu.cn](mailto:tangtong@qlu.edu.cn) (T.T.); [sunfengbo@icbr.ac.cn](mailto:sunfengbo@icbr.ac.cn) (F.S.)

**Table S1.** Visualizations of bamboo after tung oil treatment at different temperature.

| Treatment  | Visual                                                                               |
|------------|--------------------------------------------------------------------------------------|
| Untreated  |    |
| 23 °C-3 h  |    |
| 100 °C-3 h |    |
| 120 °C-3 h |   |
| 140 °C-3 h |  |
| 160 °C-3 h |  |
| 180 °C-3 h |  |
| 200 °C-3 h |  |

**Table S2.** Visualizations of bamboo after tung oil treatment at different duration of time.

| Treatment    | Visual                                                                              |
|--------------|-------------------------------------------------------------------------------------|
| Untreated    |   |
| 140 °C-0.5 h |   |
| 140 °C-1 h   |   |
| 140 °C-3 h   |  |
